# Supplementary material for: Sulfurization synthesis of a new anode material for Li-ion batteries: understanding the role of sulfurization in lithium ion conversion reactions and promoting lithium storage performance
Source: Royal Society of Chemistry journal article supplement (doi:10.1039/c9ta08394d), 2019-01-01
Supplement: c9ta08394d1.pdf [file c9ta08394d1.pdf]

## Supporting Information

### **Sulfurized Synthesis of a New Anode Material for Li-Ion Batteries: Understanding the Role of Sulfurization in Lithium Ion Conversion Reactions and Promoting Lithium Storage Performance**

Yanmin Qin,<sup>a</sup> Zhongqing Jiang,<sup>b</sup> Liping Guo,<sup>a</sup> Jianlin Huang,<sup>a,c</sup> Zhong-Jie Jiang,<sup>a,c,\*</sup>  
and Meilin Liu<sup>d</sup>

<sup>a</sup> Guangzhou Key Laboratory for Surface Chemistry of Energy Materials, New Energy Research Institute, College of Environment and Energy, South China University of Technology, Guangzhou 510006, P. R. China

<sup>b</sup> Key Laboratory of Optical Field Manipulation of Zhejiang Province, Department of Physics, Zhejiang Sci-Tech University, Hangzhou 310018, P. R. China

<sup>c</sup> Guangdong Engineering and Technology Research Center for Surface Chemistry of Energy Materials, College of Environment and Energy, South China University of Technology, Guangzhou 510006, P. R. China

<sup>d</sup> School of Materials Science and Engineering, Georgia Institute of Technology, Atlanta, GA, 30332-0245, USA

**\*Corresponding authors**

**E-mail:** eszjiang@scut.edu.cn (Z.-J. Jiang).

## Contents

|                                                                                                                 |   |
|-----------------------------------------------------------------------------------------------------------------|---|
| 1. SEM and TEM images of MnO@NC and NC .....                                                                    | 3 |
| 2. TGA curve of MnOS@NSC and XRD pattern after the TGA analysis .                                               | 3 |
| 3. Raman spectra of MnOS@NSC .....                                                                              | 4 |
| 4. Rate performance comparison of the MnOS@NSC with other TMO-based anode materials .....                       | 5 |
| 5. Electrochemical performance of NSC and NC.....                                                               | 6 |
| 6. High resolution XPS spectra of C 1s, O 1s, N 1s, and S 2p in NSC. ....                                       | 7 |
| 7. Total and projected DOSs of MnO <sub>2</sub> .....                                                           | 8 |
| 8. Comparison of the charge transfer resistance of MnOS@NSC with other MnO <sub>2</sub> -based electrodes ..... | 8 |
| References.....                                                                                                 | 9 |

## 1. SEM and TEM images of MnO@NC and NC

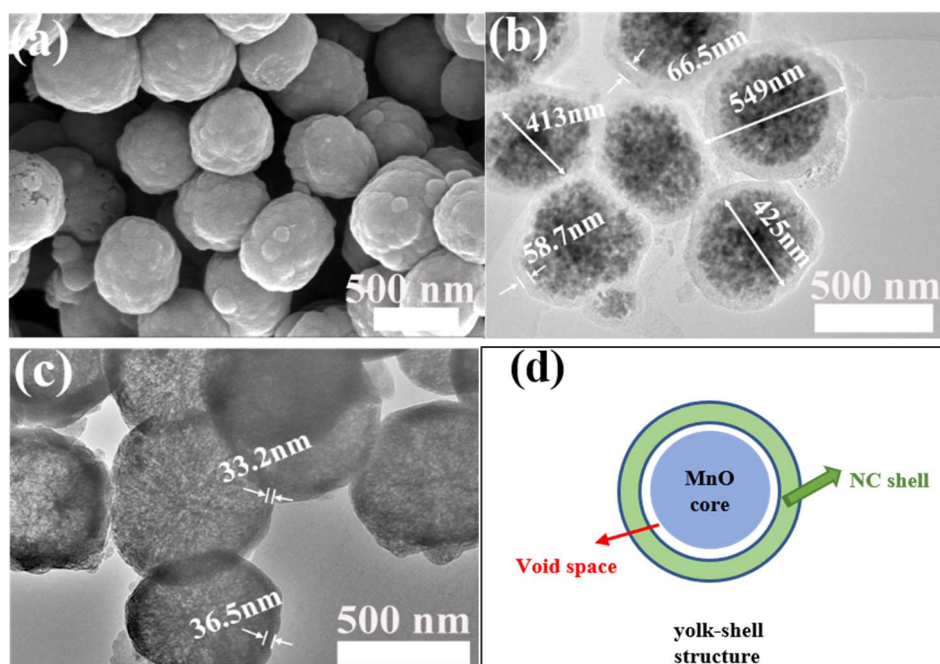

**Figure S1.** (a) SEM and (b) TEM images of MnO@NC. (c) TEM image of NC obtained from MnO@NC through the etching of MnO. (d) Schematic illustration of the yolk-shell structure of MnO@NC.

## 2. TGA curve of MnOS@NSC and XRD pattern after the TGA analysis

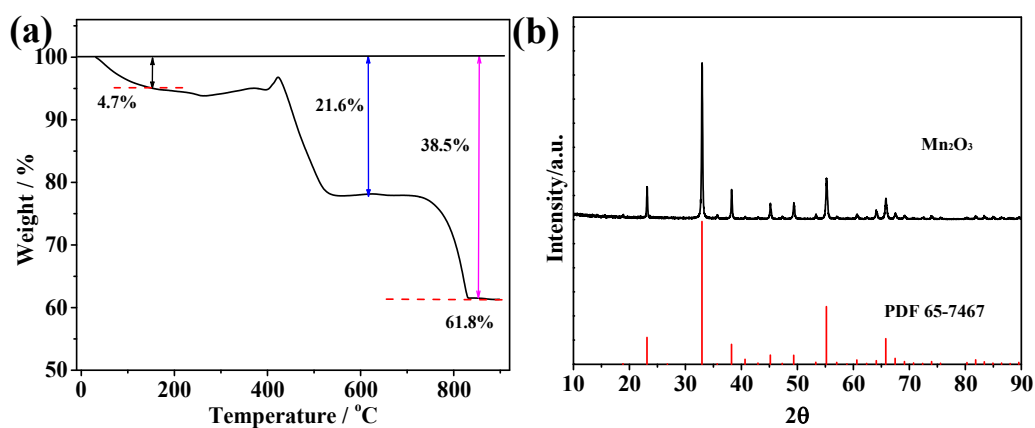

**Figure S2.** (a) TGA curve of MnOS@NSC, (b) XRD pattern of MnOS@NSC after the TGA analysis.

### Calculation of the weight percentage of the NSC in the MnOS@NSC

The weight loss of the MnOS@NSC at the TGA curves in Figure S2a below 150 °C could be attributed to the removal of physically adsorbed water. The weight increment at 420 °C can be attributed to the formation of MnSO<sub>4</sub> and/or Mn<sub>3</sub>O<sub>4</sub><sup>1</sup> and the subsequent weight loss is the decomposition of the NSC. The weight loss at 700 °C – 830 °C is the transformation of MnSO<sub>4</sub> and/or Mn<sub>3</sub>O<sub>4</sub> to Mn<sub>2</sub>O<sub>3</sub>. The formation of Mn<sub>2</sub>O<sub>3</sub> after the TGA analysis is demonstrated by the XRD pattern in Figure S2b. The content of NSC in the MnOS@NSC ( $M_{NSC}$ ) can be estimated based on Eq. S2 (where  $M$  is the weight percentage,  $W$  is the molecular weight).

$$\frac{2 \times W_{MnOS}}{100 - M_{H_2O} - M_{NSC}} = \frac{W_{Mn_2O_3}}{M_{Mn_2O_3}} \quad (S1)$$

### 3. Raman spectra of MnOS@NSC

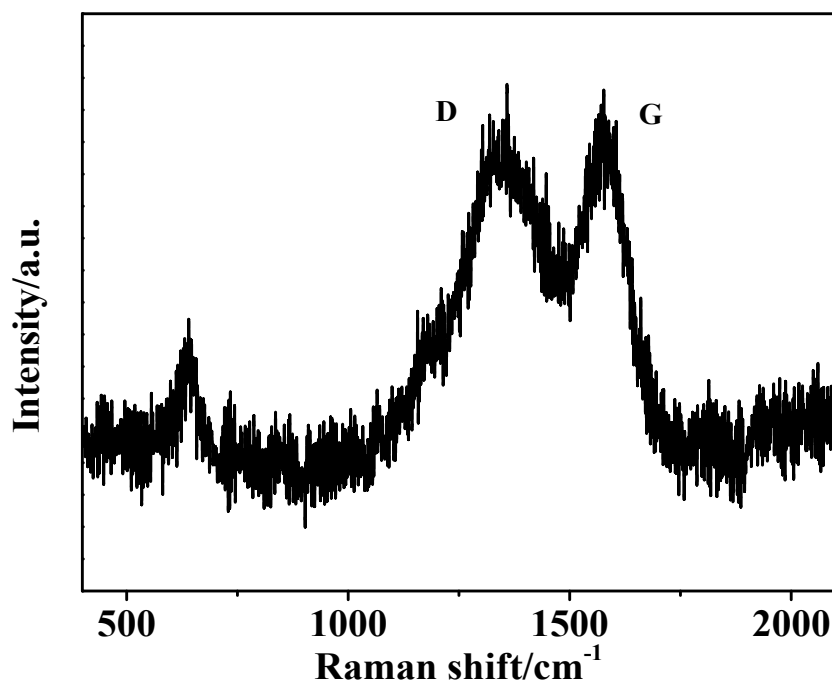

Figure S3. Raman spectra of MnOS@NSC.

## 4. Rate performance comparison of the MnOS@NSC with other TMO-based anode materials

**Table S1.** Rate performance comparison of the MnOS@NSC with other TMO-based anode materials.

| Samples                                  | mass loading<br>mg cm <sup>-2</sup> | 0.1<br>A g <sup>-1</sup> | 0.2<br>A g <sup>-1</sup> | 0.5<br>A g <sup>-1</sup> | 1.0<br>A g <sup>-1</sup> | 2.0<br>A g <sup>-1</sup> | 5.0<br>A g <sup>-1</sup> | 10.0<br>A g <sup>-1</sup> | Reference |
|------------------------------------------|-------------------------------------|--------------------------|--------------------------|--------------------------|--------------------------|--------------------------|--------------------------|---------------------------|-----------|
| MnOS@NSC                                 | 1.5                                 | 1339.3                   | 1204.1                   | 1073                     | 928.2                    | 734.7                    | 506.5                    | 290.1                     | This work |
| HCF/Mn <sub>3</sub> O <sub>4</sub>       |                                     | 880                      | 827                      | 750                      | 665                      | 528                      |                          |                           | 2         |
| Mn <sub>3</sub> O <sub>4</sub> -rGO      | 1.2                                 | 605                      | 480                      | 385                      | 302                      | 198                      |                          |                           | 3         |
| MnO <sub>2</sub> @C@<br>MnO              |                                     | 867.6                    | 709.6                    | 597.1                    | 483.5                    | 387.9                    |                          |                           | 4         |
| m MnO <sub>2</sub> -srGO                 |                                     | 946.1                    | 852                      | 805                      | 690                      | 643                      |                          |                           | 5         |
| MnO <sub>2</sub> /rGO                    |                                     | 811                      | 624                      | 394.4                    | 278.2                    | 242.4                    | 168.2                    |                           | 6         |
| MnO <sub>2</sub> @HCSO                   | 1.2                                 | 792                      | 699                      | 582                      | 495                      | 411                      | 328                      |                           | 7         |
| Porous Mn <sub>2</sub> O <sub>3</sub>    |                                     | 1012                     | 809                      | 625                      | 509                      | 411                      | 185                      |                           | 8         |
| G/MnO-800                                | 1.5                                 | 1000                     | 930                      | 875                      | 762                      | 604                      |                          |                           | 9         |
| MnO@NC                                   | 1.0                                 | 762                      | 707                      | 643                      | 570                      | 512                      |                          |                           | 10        |
| MnO/RGO                                  |                                     | 948                      | 817                      | 575                      | 489                      |                          |                          |                           | 11        |
| p-MnO@N-C<br>NTs                         | 1-1.5                               | 945.5                    | 922                      | 859.5                    | 785.7                    |                          |                          |                           | 12        |
| MnO@GS/CNT                               | 1.0                                 | 677                      | 600                      | 620                      | 580                      | 530                      |                          |                           | 13        |
| MnO@CNFs                                 | 1.2-1.5                             | 817                      | 755                      | 637                      | 520                      | 407                      |                          |                           | 14        |
| MnO@NC                                   |                                     | 780                      | 650                      | 520                      | 410                      | 335                      |                          |                           | 15        |
| Fe <sub>2</sub> O <sub>3</sub> /carbon   |                                     |                          | 790                      | 570                      | 450                      | 300                      |                          | 130                       | 16        |
| α- Fe <sub>2</sub> O <sub>3</sub> -CNFs  | 1.77                                | 430                      | 385                      | 288                      |                          |                          |                          |                           | 17        |
| Fe <sub>3</sub> O <sub>4</sub> -C        |                                     |                          | 750                      | 585                      | 518                      | 435                      | 198                      |                           | 18        |
| Fe <sub>3</sub> O <sub>4</sub> -graphene | 1.0                                 | 1045                     |                          | 600                      | 410                      |                          |                          |                           | 19        |
| Mesoporous<br>NiO                        |                                     | 712                      | 656                      | 607                      | 582                      | 515                      |                          |                           | 20        |
| Porous NiO                               |                                     |                          | 510                      | 495                      | 468                      |                          |                          |                           | 21        |
| NiO/C                                    |                                     | 790                      |                          | 616                      | 461                      |                          |                          |                           | 22        |
| NiO-GNS                                  |                                     | 1053                     | 1059                     | 967                      | 823                      |                          |                          |                           | 22        |
| CoO-G-C                                  |                                     | 770                      | 680                      | 570                      | 490                      | 400                      |                          |                           | 23        |
| CoO/C                                    |                                     | 485                      | 382                      |                          |                          |                          |                          |                           | 24        |
| Co <sub>3</sub> O <sub>4</sub> /graphene |                                     | 990                      | 975                      | 805                      | 600                      |                          |                          |                           | 25        |
| Co <sub>3</sub> O <sub>4</sub> @CNT      |                                     | 789                      | 680                      | 505                      | 453                      |                          | 408                      |                           | 26        |

## 5. Electrochemical performance of NSC and NC

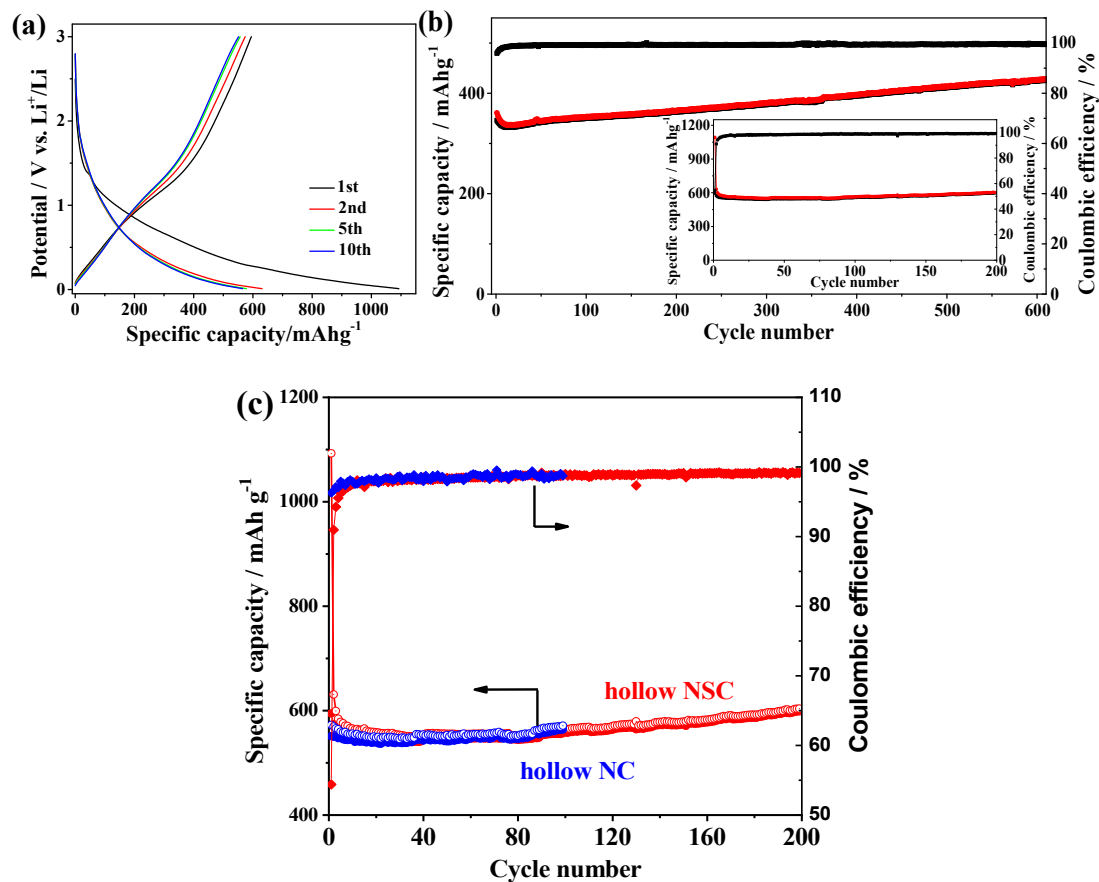

**Figure S4.** (a) Charge/discharge profiles of the NSC at 100 mA g<sup>-1</sup>. (b) Cycling performance and Coulombic efficiency of the NSC at 1000 mA g<sup>-1</sup>. The inset shows the cycling performance and Coulombic efficiency of the NSC at 100 mA g<sup>-1</sup>. (c) The cycling performance and Coulombic efficiency of the hollow NSC and hollow NC at 100 mA g<sup>-1</sup>.

## 6. High resolution XPS spectra of C 1s, O 1s, N 1s, and S 2p in NSC.

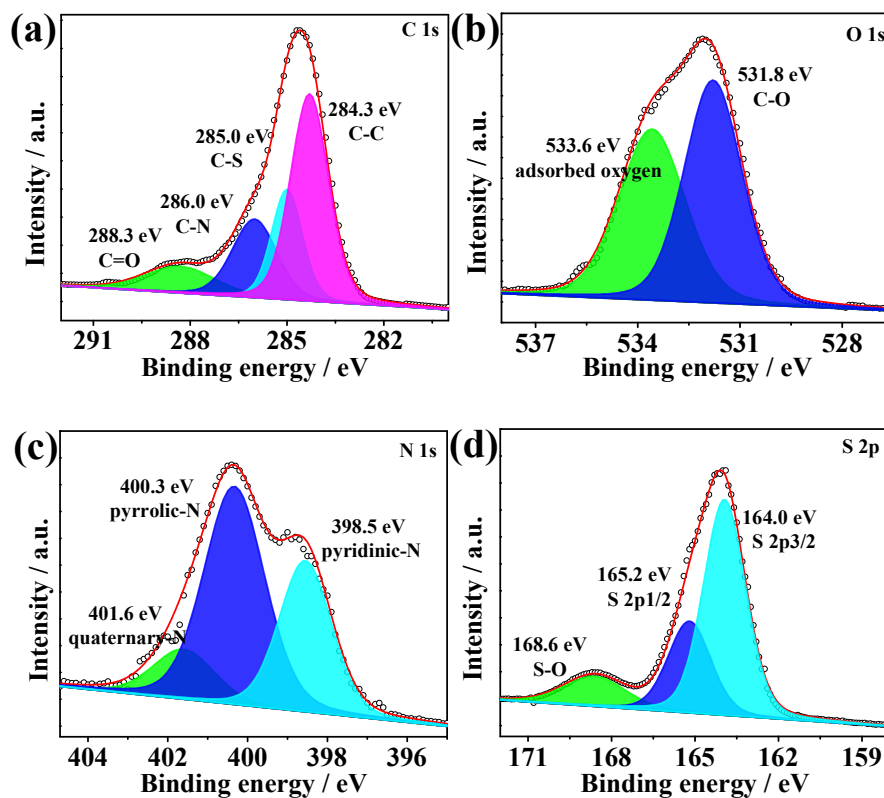

**Figure S5.** High resolution XPS spectra of (a) C 1s, (b) O 1s, (c) N 1s, and (d) S 2p in NSC.

**Table S2.** Atomic percentages of C, O, N and S in NSC.

| Sample | C (%) | O (%) | N (%) | S (%) |
|--------|-------|-------|-------|-------|
| NSC    | 79.53 | 11.99 | 6.89  | 1.59  |

## 7. Total and projected DOSs of MnO<sub>2</sub>

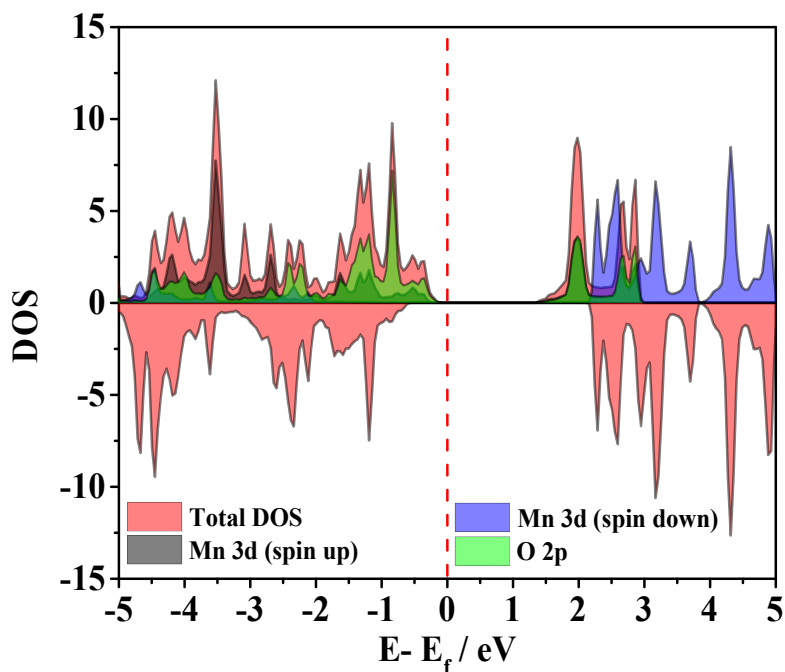

Figure S6. Total and projected DOS of Mn and O atoms.

## 8. Comparison of the charge transfer resistance of MnOS@NSC with other MnO<sub>2</sub>-based electrodes

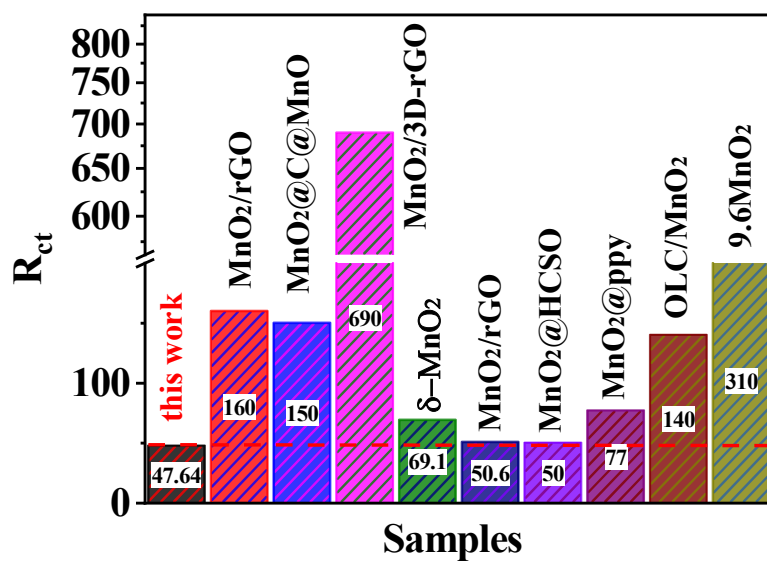

Figure S7. Comparison of the charge transfer resistance with MnO and other MnO<sub>2</sub>-



based electrodes.

**Table S3.** Comparison of the charge transfer resistance with MnO and other MnO<sub>2</sub>-based electrodes.

| Samples                  | mass loading mg<br>cm <sup>-2</sup> | R <sub>ct</sub> | Reference |
|--------------------------|-------------------------------------|-----------------|-----------|
| MnOS@NC-1                | 1.5                                 | 47.64           | This work |
| MnO <sub>2</sub> /rGO    | -                                   | 160             | 27        |
| MnO <sub>2</sub> @C@MnO  | -                                   | 150             | 4         |
| MnO <sub>2</sub> /3D-rGO | -                                   | 690             | 28        |
| δ-MnO <sub>2</sub>       | 1.1                                 | 69.1            | 29        |
| MnO <sub>2</sub> /rGO    | -                                   | 50.6            | 6         |
| MnO <sub>2</sub> @HCSO   | 1.2                                 | 50              | 7         |
| MnO <sub>2</sub> @ppy    | 0.87                                | 77              | 30        |
| OLC/MnO <sub>2</sub>     | 3-4                                 | 140             | 31        |
| 9.6 MnO <sub>2</sub>     | 1.0                                 | 310             | 32        |
| MnO@NC                   | 1.4                                 | 100             | 33        |

## References

1. X. Xu, S. Ji, M. Gu and J. Liu, *ACS Appl. Mater. Interfaces*, 2015, **7**, 20957-20964.
2. D. Zhang, G. Li, J. Fan, B. Li and L. Li, *Chem. Eur. J.*, 2018, **24**, 9632-9638.
3. S. P. Varghese, B. Babu, R. Prasannachandran, R. Antony and M. M. Shaijumon, *J. Alloy. Compd.*, 2019, **780**, 588-596.
4. L. Zheng, Y. Liu, J. Lan, Y. Yu and X. Yang, *Chem. Eng. J.*, 2017, **330**, 1289-1296.
5. T. Xu, Q. Meng, Q. Fan, M. Yang, W. Zhi and B. Cao, *Chin. J. Chem.*, 2017, **35**, 1575-1585.
6. A. Aijaz, J. Masa, S. Rösler, W. Xia, P. Weide, A. J. R. Botz, R. A. Fischer, W. Schuhmann and M. Muhler, *Angew. Chem. Int. Ed.*, 2016 **55**, 4087-4091.
7. J. Zang, J. Ye, H. Qian, Y. Lin, X. Zhang, M. Zheng and Q. Dong, *Electrochim. Acta*, 2018, **260**, 783-788.
8. B. Zhang, S. Hao, D. Xiao, J. Wu and Y. Huang, *Mater. Design*, 2016, **98**, 319-323.
9. L. Sheng, S. Liang, T. Wei, J. Chang, Z. Jiang, L. Zhang, Q. Zhou, J. Zhou, L. Jiang and Z. Fan, *Energy Storage Materials*, 2018, **12**, 94-102.
10. G. Zhu, L. Wang, H. Lin, L. Ma, P. Zhao, Y. Hu, T. Chen, R. Chen, Y. Wang, Z. Tie, J. Liu and Z. Jin, *Adv. Funct. Mater.*, 2018, **28**, 1800003.
11. P. Rosaiah, J. Zhu, O. M. Hussain and Y. Qiu, *Ceram. Int.*, 2018, **44**, 3077-3084.
12. D.-S. Liu, D.-H. Liu, B.-H. Hou, Y.-Y. Wang, J.-Z. Guo, Q.-L. Ning and X.-L. Wu, *Electrochim. Acta*, 2018, **264**, 292-300.
13. J. Wang, Q. Deng, M. Li, C. Wu, K. Jiang, Z. Hu and J. Chu, *Nanotechnology*, 2018, **29**, 315403.

14. Y. Guo, L. Zheng, J.-L. Lan, Y. Yu and X. Yang, *Electrochim. Acta*, 2018, **269**, 624-631.
15. Q. Gou, C. Li, W. Zhong, X. Zhang, Q. Dong and C. Lei, *Electrochim. Acta*, 2019, **296**, 730-737.
16. Y. Li, C. Zhu, T. Lu, Z. Guo, D. Zhang, J. Ma and S. Zhu, *Carbon*, 2013, **52**, 565-573.
17. L. Ji, O. Toprakci, M. Alcoutlabi, Y. Yao, Y. Li, S. Zhang, B. Guo, Z. Lin and X. Zhang, *ACS Appl. Mater. Interfaces*, 2012, **4**, 2672-2679.
18. W.-M. Zhang, X.-L. Wu, J.-S. Hu, Y.-G. Guo and L.-J. Wan, *Adv. Funct. Mater.*, 2008, **18**, 3941-3946.
19. P. Lian, X. Zhu, H. Xiang, Z. Li, W. Yang and H. Wang, *Electrochim. Acta*, 2010, **56**, 834-840.
20. H. Liu, G. Wang, J. Liu, S. Qiao and H. Ahn, *J. Mater. Chem.*, 2011, **21**, 3046-3052.
21. C. Wang, D. Wang, Q. Wang and H. Chen, *J. Power Sources*, 2010, **195**, 7432-7437.
22. Y. Xia, W. Zhang, Z. Xiao, H. Huang, H. Zeng, X. Chen, F. Chen, Y. Gan and X. Tao, *J. Mater. Chem.*, 2012, **22**, 9209-9215.
23. M. Zhang, F. Yan, X. Tang, Q. Li, T. Wang and G. Cao, *J. Mater. Chem. A*, 2014, **2**, 5890-5897.
24. W. Yuan, J. Zhang, D. Xie, Z. Dong, Q. Su and G. Du, *Electrochim. Acta*, 2013, **108**, 506-511.
25. H. Kim, D.-H. Seo, S.-W. Kim, J. Kim and K. Kang, *Carbon*, 2011, **49**, 326-332.
26. D. Gu, W. Li, F. Wang, H. Bongard, B. Spliethoff, W. Schmidt, C. Weidenthaler, Y. Xia, D. Zhao and F. Schuth, *Angew. Chem. Int. Ed.*, 2015, **54**, 7060-7064.
27. S. J. Kim, Y. J. Yun, K. W. Kim, C. Chae, S. Jeong, Y. Kang, S. Y. Choi, S. S. Lee and S. Choi, *ChemSusChem*, 2015, **8**, 1484-1491.
28. H. Liu, Z. Hu, Y. Su, H. Ruan, R. Hu and L. Zhang, *Appl. Surf. Sci.*, 2017, **392**, 777-784.
29. A. A. Voskanyan, C.-K. Ho and K. Y. Chan, *J. Power Sources*, 2019, **421**, 162-168.
30. Z. Fan, J. Yan, T. Wei, L. Zhi, G. Ning, T. Li and F. Wei, *Adv. Funct. Mater.*, 2011, **21**, 2366-2375.
31. Y. Wang, Z. J. Han, S. F. Yu, R. R. Song, H. H. Song, K. Ostrikov and H. Y. Yang, *Carbon*, 2013, **64**, 230-236.
32. H. Liu, Z. Hu, H. Ruan, R. Hu, Y. Su, L. Zhang and J. Zhang, *J. Mater. Sci: Mater. Electron.*, 2016, **27**, 11541-11547.
33. Y. Qin, Z. Jiang, H. Rong, L. Guo and Z.-J. Jiang, *Electrochim. Acta*, 2018, **282**, 719-727.
